# Supplementary material for: A quasilinear hydrazone-based mononuclear dysprosium compound withC4vsymmetry exhibiting field-induced complex magnetic relaxation
Source: Royal Society of Chemistry journal article supplement (doi:10.1039/d1nj04620a), 2021-01-01
Supplement: d1nj04620a1.pdf [file d1nj04620a1.pdf]

# Supporting Information for:

## **A quasilinear hydrazone-based mononuclear dysprosium compound in weak easy-plane anisotropy exhibiting field-induced complex magnetic relaxation<sup>†</sup>**

Peiqiong Chen,<sup>‡a</sup> Xiao Sun,<sup>‡a</sup> Xuefeng Guo,<sup>b</sup> Dan Liu,<sup>\*b</sup> Hou-Ting Liu,<sup>a</sup> Jing Lu<sup>\*a</sup> and Haiquan Tian<sup>\*a</sup>

<sup>a</sup> Shandong Provincial Key Laboratory of Chemical Energy Storage and Novel Cell Technology, School of Chemistry and Chemical Engineering, Liaocheng University, Liaocheng 252059, P. R. China. E-mail: [tianhaiquan@lcu.edu.cn](mailto:tianhaiquan@lcu.edu.cn), [lujing@lcu.edu.cn](mailto:lujing@lcu.edu.cn)

<sup>b</sup> Institute of Flexible Electronics, Northwestern Polytechnical University, 127 West Youyi Road, Xi'an, 710072, Shaanxi, China. E-mail: [jamdliu@nwpu.edu.cn](mailto:jamdliu@nwpu.edu.cn)

<sup>‡</sup> These authors contributed equally to this work.

**Table S1.** Selected bond lengths (Å) and angles (°) for compound **I**.

| Compound I |          |            |          |             |          |
|------------|----------|------------|----------|-------------|----------|
| Dy1–O1     | 2.432(7) | O1-Dy1-N12 | 71.0(2)  | N5-Dy1-N9   | 131.2(2) |
| Dy1–O2     | 2.493(7) | O1-Dy1-N13 | 135.9(3) | N5-Dy1-N10  | 149.0(2) |
| Dy1–N4     | 2.519(7) | O2-Dy1-N4  | 67.7(2)  | N5-Dy1-N11  | 74.3(3)  |
| Dy1–N5     | 2.584(7) | O2-Dy1-N5  | 76.7(2)  | N5-Dy1-N12  | 103.3(2) |
| Dy1–N9     | 2.510(6) | O2-Dy1-N9  | 62.9(2)  | N5-Dy1-N13  | 76.4(3)  |
| Dy1–N10    | 2.605(7) | O2-Dy1-N10 | 125.2(2) | N9-Dy1-N10  | 62.4(2)  |
| Dy1–N11    | 2.408(9) | O2-Dy1-N11 | 142.6(3) | N9-Dy1-N11  | 124.2(3) |
| Dy1–N12    | 2.411(7) | O2-Dy1-N12 | 135.7(2) | N9-Dy1-N12  | 68.4(3)  |
| Dy1–N13    | 2.399(8) | O2-Dy1-N13 | 75.9(3)  | N9-Dy1-N13  | 68.4(3)  |
| O1-Dy1-O2  | 73.2(2)  | N4-Dy1-N5  | 62.2(2)  | N10-Dy1-N11 | 76.0(3)  |
| O1-Dy1-N4  | 63.5(2)  | N4-Dy1-N9  | 119.1(2) | N10-Dy1-N12 | 76.7(2)  |
| O1-Dy1-N5  | 124.6(2) | N4-Dy1-N10 | 142.2(2) | N10-Dy1-N13 | 87.7(3)  |
| O1-Dy1-N9  | 69.8(2)  | N4-Dy1-N11 | 116.6(3) | N11-Dy1-N12 | 74.6(3)  |
| O1-Dy1-N10 | 85.3(2)  | N4-Dy1-N12 | 73.4(2)  | N11-Dy1-N13 | 74.7(3)  |
| O1-Dy1-N11 | 143.8(3) | N4-Dy1-N13 | 129.4(3) | N12-Dy1-N13 | 148.1(3) |

Symmetry codes: (a) 1.5-x, 1-y, z.

**Table S2.** Hydrogen bonds in compound **I**.

| <b>Compound I</b> |            |              |              |            |
|-------------------|------------|--------------|--------------|------------|
| D–H···A           | d(D–H) (Å) | d(H···A) (Å) | d(D···A) (Å) | <(DHA) (°) |
| N3–H3A···O3       | 0.8800     | 1.9000       | 2.739(11)    | 158.00     |
| C2–H2···N8        | 0.9500     | 2.0500       | 2.934(11)    | 154.00     |
| C4–H4···O3        | 0.9500     | 2.3300       | 3.273(13)    | 172.00     |
| C4–H4···N3        | 0.9500     | 2.3300       | 2.680(11)    | 101.00     |
| C11–<br>H11···N13 | 0.9500     | 2.5800       | 3.117(13)    | 116.00     |
| C15–H15···N8      | 0.9500     | 2.3100       | 2.662(11)    | 101.00     |
| C20–H20···S3      | 0.9500     | 2.7500       | 3.582(11)    | 146.00     |

Symmetry codes: (a) 1.5-x, 1-y, z; (b) 1.5-x, 1-y, z; (c) 1.5-x, 1-y, z; (d) 1.5-x, 0.5+y, 0.5-z.

**Table S3.** Dy<sup>III</sup> geometry analysis of **I** by SHAPE 2.1 software.

| <b>Compound I</b>        |            |                          |            |
|--------------------------|------------|--------------------------|------------|
| <b>Geometry (CN = 9)</b> | <b>Dy1</b> | <b>Geometry (CN = 9)</b> | <b>Dy1</b> |
| <b>EP-9</b>              | 35.886     | <b>CSAPR-9</b>           | 0.822      |
| <b>OPY-9</b>             | 22.710     | <b>JTCTPR-9</b>          | 2.886      |
| <b>HBPY-9</b>            | 19.947     | <b>TCTPR-9</b>           | 1.474      |
| <b>JTC-9</b>             | 15.761     | <b>JTDIC-9</b>           | 12.137     |
| <b>JCCU-9</b>            | 11.316     | <b>HH-9</b>              | 10.599     |
| <b>CCU-9</b>             | 9.379      | <b>MFF-9</b>             | 1.471      |
| <b>JCSAPR-9</b>          | 1.650      |                          |            |

| <b>Lable</b>    | <b>Shape</b>                                     | <b>Lable</b>    | <b>Shape</b>                                          |
|-----------------|--------------------------------------------------|-----------------|-------------------------------------------------------|
| <b>EP-9</b>     | Enneagon (D <sub>9h</sub> )                      | <b>CSAPR-9</b>  | Spherical capped square antiprism (C <sub>4v</sub> )  |
| <b>OPY-9</b>    | Octagonal pyramid (C <sub>8v</sub> )             | <b>JTCTPR-9</b> | Tricapped trigonal prism J51 (D <sub>3h</sub> )       |
| <b>HBPY-9</b>   | Heptagonal bipyramid (D <sub>7h</sub> )          | <b>TCTPR-9</b>  | Spherical tricapped trigonal prism (D <sub>3h</sub> ) |
| <b>JTC-9</b>    | Johnson triangular cupola J3 (C <sub>3v</sub> )  | <b>JTDIC-9</b>  | Tridiminished icosahedron J63 (C <sub>3v</sub> )      |
| <b>JCCU-9</b>   | Capped cube J8 (C <sub>4v</sub> )                | <b>HH-9</b>     | Hula-hoop (C <sub>2v</sub> )                          |
| <b>CCU-9</b>    | Spherical-relaxed capped cube (C <sub>4v</sub> ) | <b>MFF-9</b>    | Muffin (C <sub>s</sub> )                              |
| <b>JCSAPR-9</b> | Capped square antiprism J10 (C <sub>4v</sub> )   |                 |                                                       |

**Table S4.** Relaxation fitting parameters from least-squares fitting of  $\chi(\omega)$  data for compound I.

| <i>T</i> | $\chi_{s, \text{tot}}$ | FR             |            |                          | SR             |            |                          |
|----------|------------------------|----------------|------------|--------------------------|----------------|------------|--------------------------|
|          |                        | $\Delta\chi_1$ | $\alpha_1$ | $\ln(\tau_1 / \text{s})$ | $\Delta\chi_2$ | $\alpha_2$ | $\ln(\tau_2 / \text{s})$ |
| 1.9      | -8.457(9)              | 33.86(1)       | 0.191(4)   | -1.598(2)                | 0.65(1)        | 0.293(5)   | -7.401(3)                |
| 2.2      | -10.329(7)             | 28.97(5)       | 0.176(9)   | -1.609(9)                | 4.32(8)        | 0.263(1)   | -7.482(8)                |
| 2.5      | -12.521(5)             | 21.15(9)       | 0.154(3)   | -1.685(4)                | 10.81(5)       | 0.257(1)   | -7.810(1)                |
| 3.0      | -15.320(7)             | 15.46(3)       | 0.117(1)   | -1.653(4)                | 14.07(1)       | 0.229(5)   | -8.611(2)                |
| 3.5      | -17.614(8)             | 10.51(9)       | 0.101(7)   | -1.642(5)                | 18.90(7)       | 0.216(7)   | -9.840(3)                |
| 4.0      | -19.906(8)             | 8.643(1)       | 0.092(9)   | --                       | 20.68(5)       | 0.194(3)   | -11.165(7)               |
| 4.5      | -21.464(1)             | 6.837(5)       | 0.087(8)   | --                       | 22.08(1)       | 0.179(1)   | -13.103(2)               |
| 5.0      | -22.236(2)             | 4.959(8)       | 0.075(5)   | --                       | 23.75(9)       | 0.170(3)   | -14.802(9)               |

**Table S5.** Relaxation fitting parameters from least-squares fitting of  $\chi(\omega)$  data under the dc applied field for **I**.

|          |                        | FR             |            |                     | SR             |            |                     |
|----------|------------------------|----------------|------------|---------------------|----------------|------------|---------------------|
| $F$ (Oe) | $\chi_{s, \text{tot}}$ | $\Delta\chi_1$ | $\alpha_1$ | $\tau_1 / \text{s}$ | $\Delta\chi_2$ | $\alpha_2$ | $\tau_2 / \text{s}$ |
| 200      | 1.369(7)               | 0.057(1)       | 0.051(9)   | 0.1159(5)           | 0.620(8)       | 0.544(2)   | 8.038(3)E-4         |
| 400      | 0.669(7)               | 0.278(1)       | 0.077(4)   | 0.1195(9)           | 1.219(9)       | 0.455(8)   | 0.0012(1)           |
| 600      | 0.358(3)               | 0.216(5)       | 0.089(7)   | 0.1270(6)           | 1.377(2)       | 0.176(7)   | 0.0014(7)           |
| 800      | 0.194(2)               | 0.368(8)       | 0.093(9)   | 0.1354(9)           | 1.334(8)       | 0.175(7)   | 0.0014(8)           |
| 1000     | 0.077(4)               | 0.416(3)       | 0.103(4)   | 0.1461(2)           | 1.239(8)       | 0.093(6)   | 0.0013(5)           |
| 1200     | -0.032(9)              | 0.618(3)       | 0.104(3)   | 0.1657(7)           | 1.094(8)       | 0.181(7)   | 0.0011(1)           |
| 1400     | -0.293(2)              | 3.582(9)       | 0.086(3)   | 0.1799(9)           | 0.893(1)       | 0.500(8)   | 8.356(7)E-4         |
| 1600     | -0.177(4)              | 2.160(1)       | 0.103(1)   | 0.1928(3)           | 0.802(7)       | 0.421(6)   | 6.296(2)E-4         |
| 1800     | -0.160(2)              | 0.743(1)       | 0.163(2)   | 0.2146(6)           | 0.769(8)       | 0.192(4)   | 4.756(3)E-4         |
| 2000     | -0.097(9)              | 0.674(4)       | 0.209(9)   | 0.2352(5)           | 0.712(7)       | 0.185(5)   | 3.360(3)E-4         |
| 2200     | -0.009(9)              | 0.678(6)       | 0.252(6)   | 0.2460(7)           | 0.660(5)       | 0.138(8)   | 2.262(8)E-4         |
| 2400     | 0.076(8)               | 0.688(5)       | 0.281(3)   | 0.2642(2)           | 0.605(5)       | 0.164(3)   | 1.513(2)E-4         |
| 2600     | 0.147(5)               | 0.717(8)       | 0.330(9)   | 0.2845(9)           | 0.598(6)       | 0.193(6)   | 8.860(1)E-5         |
| 2800     | 0.042(6)               | 0.450(8)       | 0.532(5)   | 0.2936(5)           | 1.256(9)       | 0.051(8)   | 6.600(8)E-6         |
| 3000     | 0.156(6)               | 0.377(7)       | 0.560(6)   | 0.3032(7)           | 1.646(5)       | 0.031(4)   | 1.519(3)E-6         |

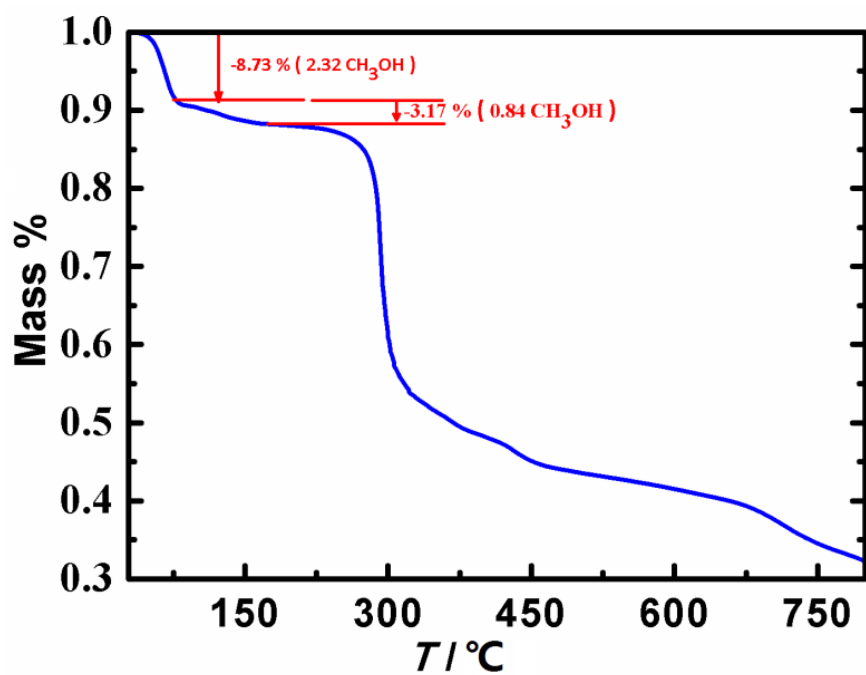

Figure S1. Thermal analysis of compound I.

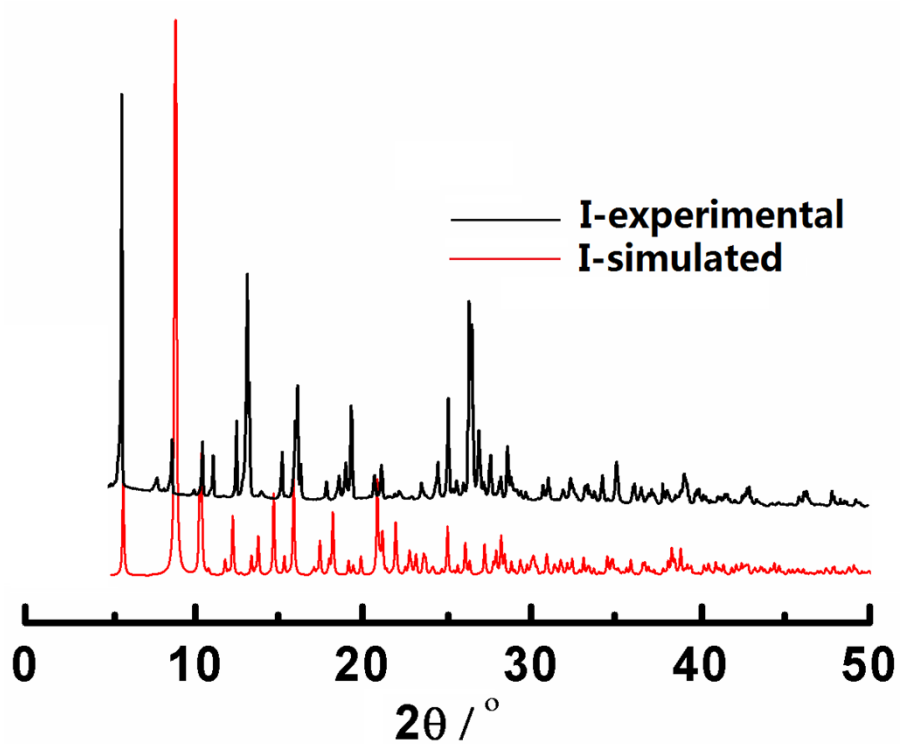

Figure S2. The powder XRD patterns for compound I.

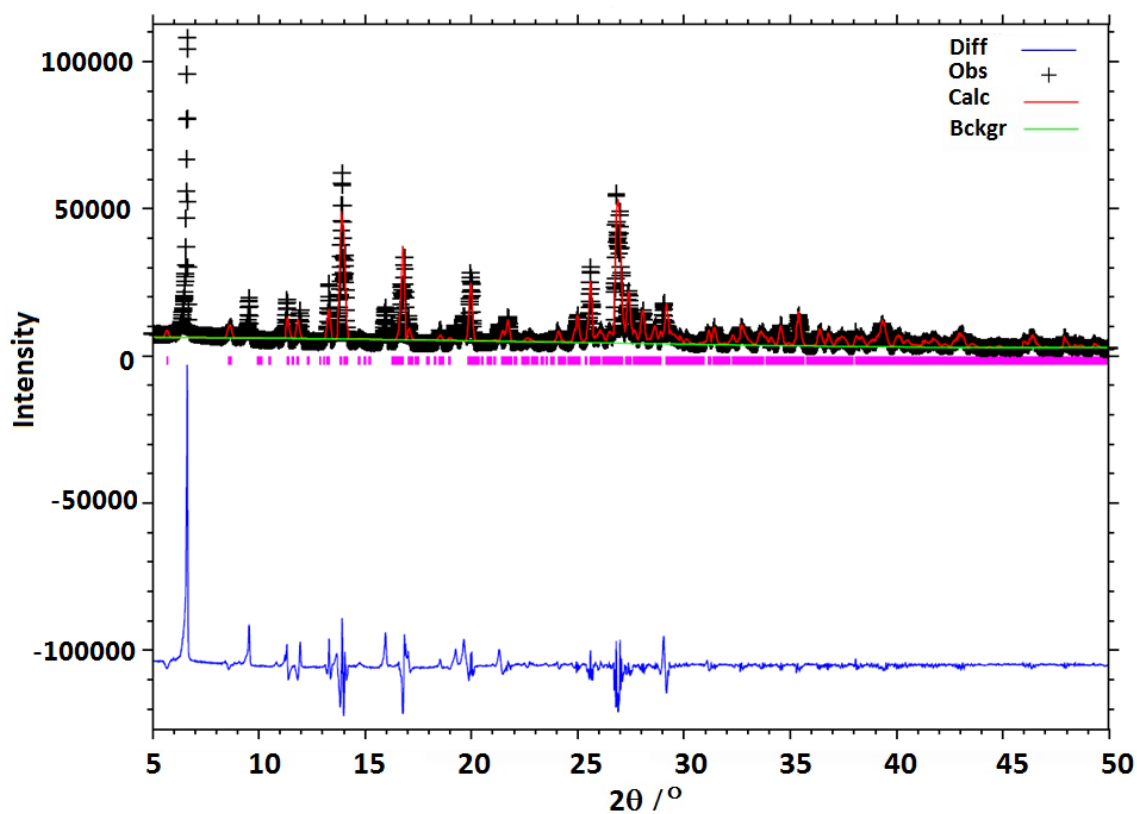

**Figure S3.** The black circles are for the observed data in **I**. The red solid line is for the calculated data. The grey solid curve is for the difference. The vertical bars are the positions of Bragg peaks. Cell parameters:  $Pbca$ ,  $a = 13.74 \text{ \AA}$ ,  $b = 17.50 \text{ \AA}$ ,  $c = 31.15 \text{ \AA}$ ,  $\alpha = 90.0^\circ$ ,  $\beta = 90.0^\circ$ ,  $\gamma = 90.0^\circ$ ,  $V = 7511.6 \text{ \AA}^3$  ( $wRp = 0.091$ ). Thermal analysis of compound **I**.



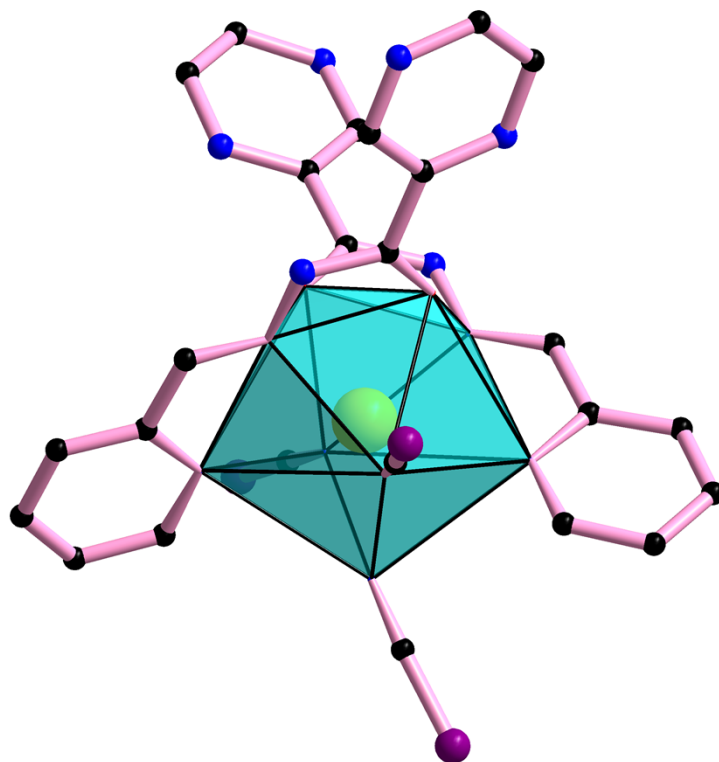

**Figure S4.** Coordination environments of the crystallographically independent Dy<sup>III</sup> ion in **I**.

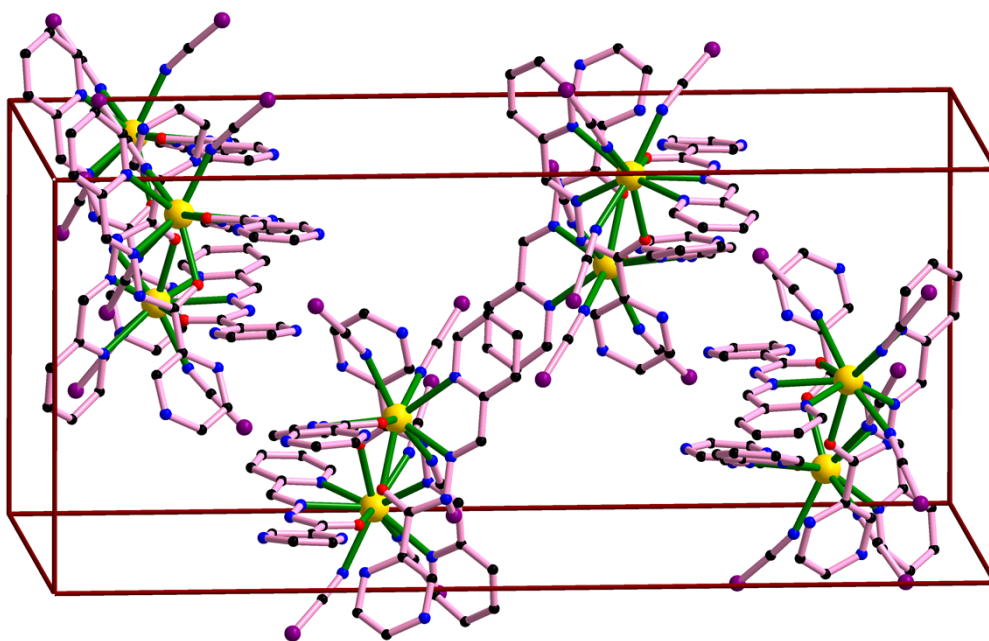

**Figure S5.** Unit cell of **I** showing the presence of eight crystallographically molecules.

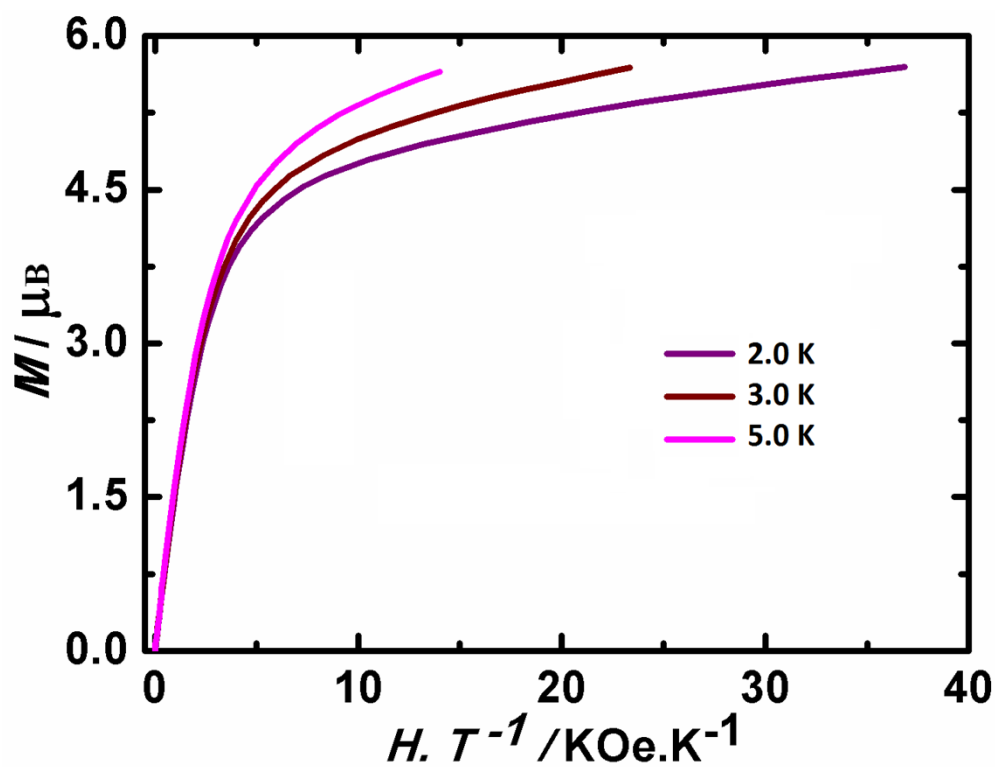

Figure S6. Magnetization data for compound I at temperature range of 2.0 K – 5.0 K.

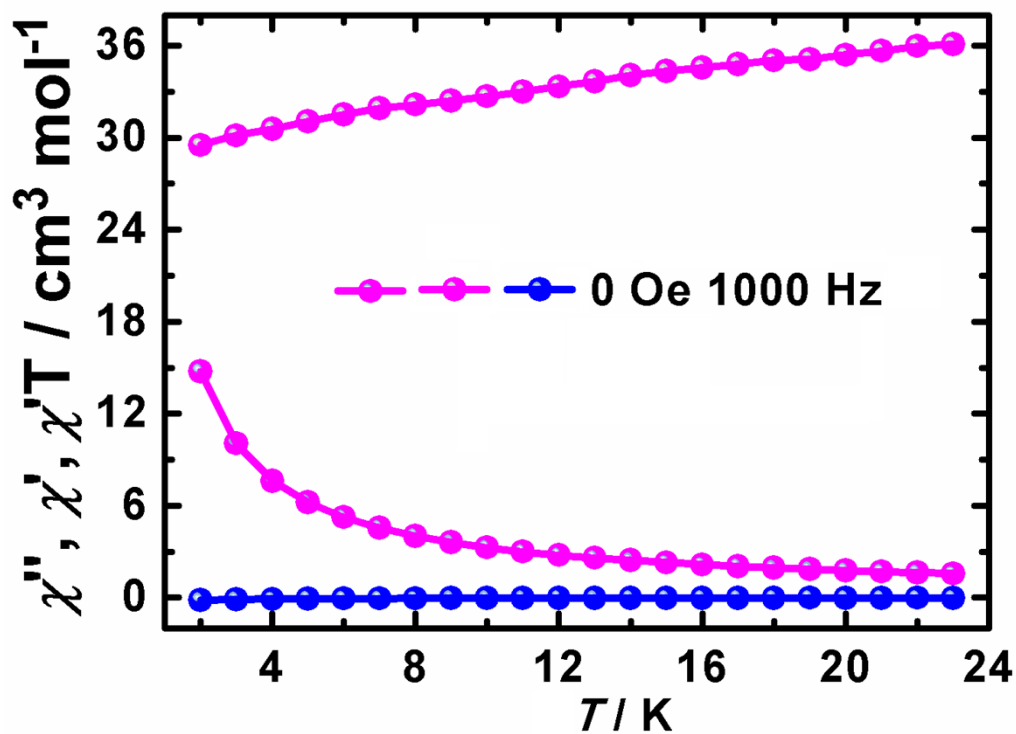

Figure S7. Temperature dependence of the  $\chi''T$ ,  $\chi'$  and  $\chi''$  ac susceptibilities under zero-field for compound I.

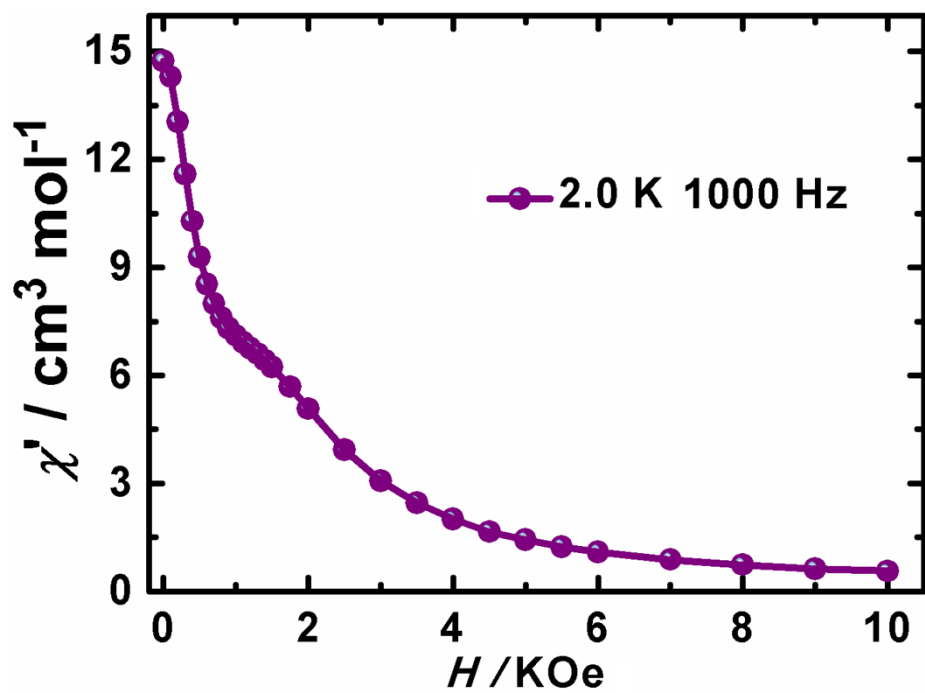

Figure S8. Field dependence of the  $\chi'_{ac}$  susceptibility of compound I at 1000 Hz and 2 K.

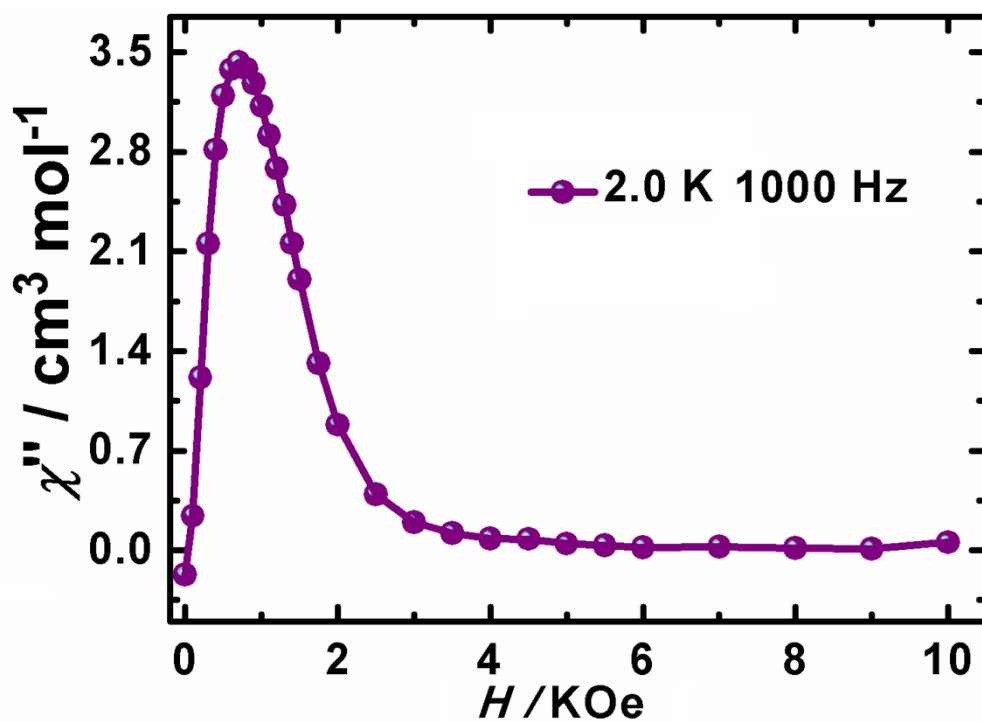

Figure S9. Field dependence of the  $\chi''_{ac}$  susceptibility of compound I at 1000 Hz and 2 K.

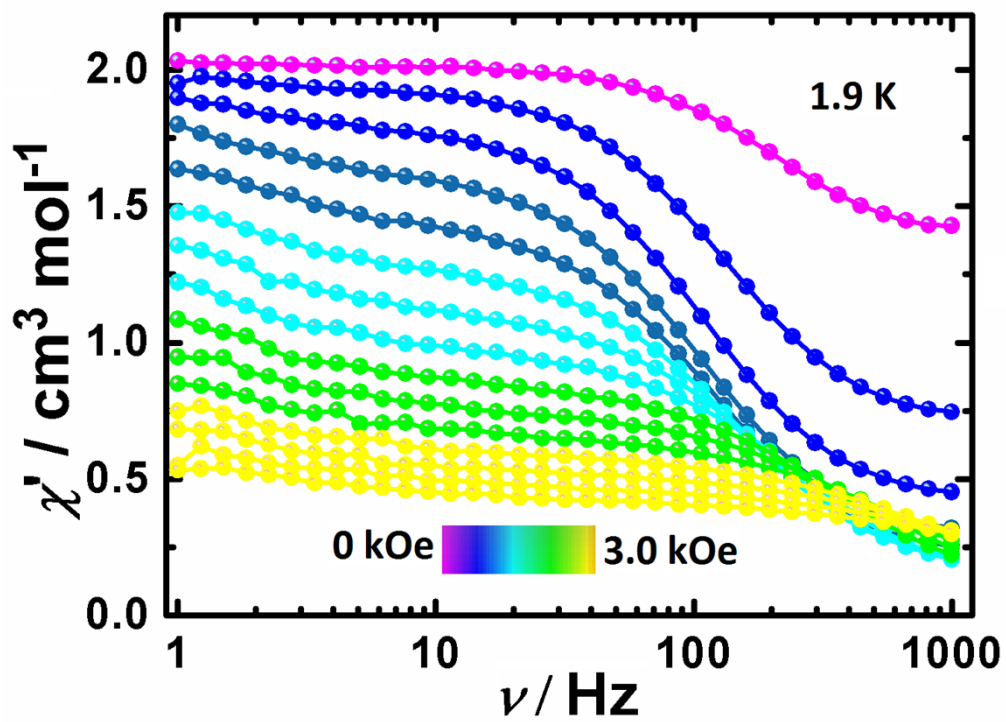

**Figure S10.** Frequency dependence of the  $\chi'$  ac susceptibility of compound I under various applied dc fields at 2.0 K.

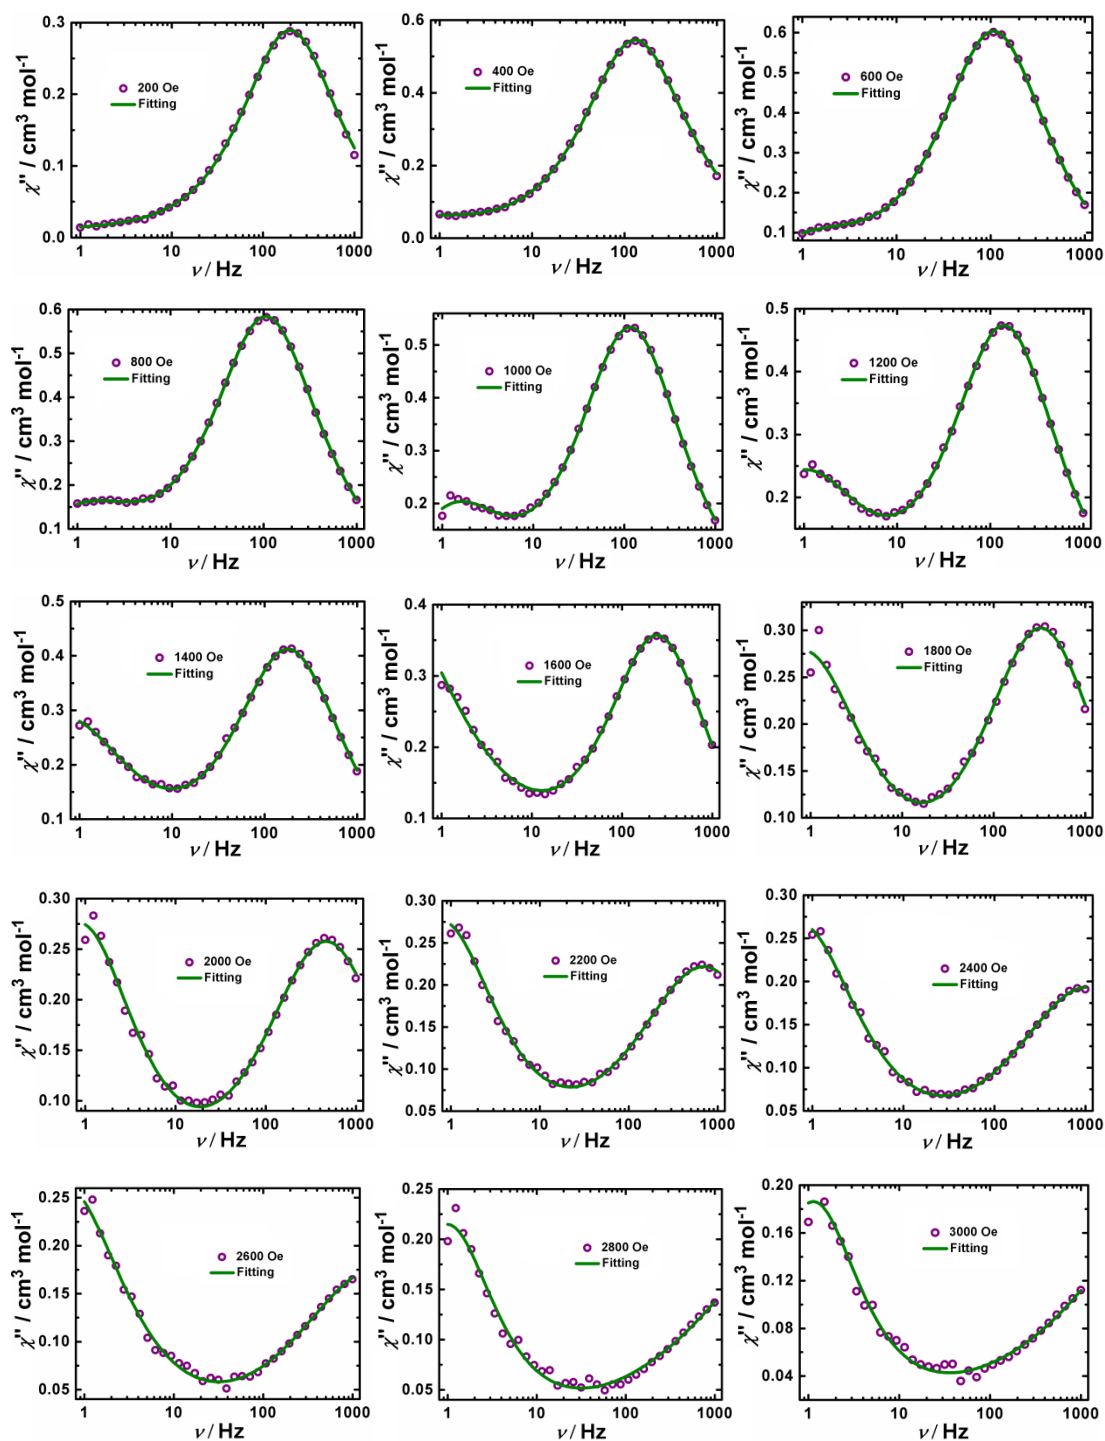

**Figure S11.** Frequency dependence of the out-of-phase ( $\chi''$ ) ac susceptibility of compound **I**. The solid lines represent the best fits.

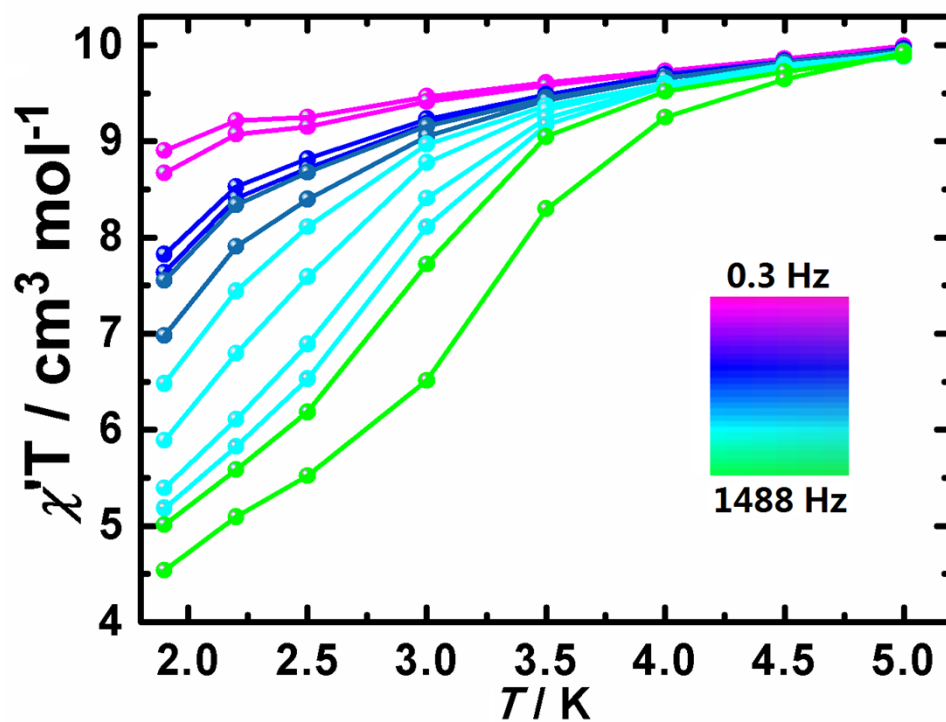

Figure S12. Temperature dependence of the  $\chi'T ac$  susceptibility under the optimal 0.7 kOe static field for I.

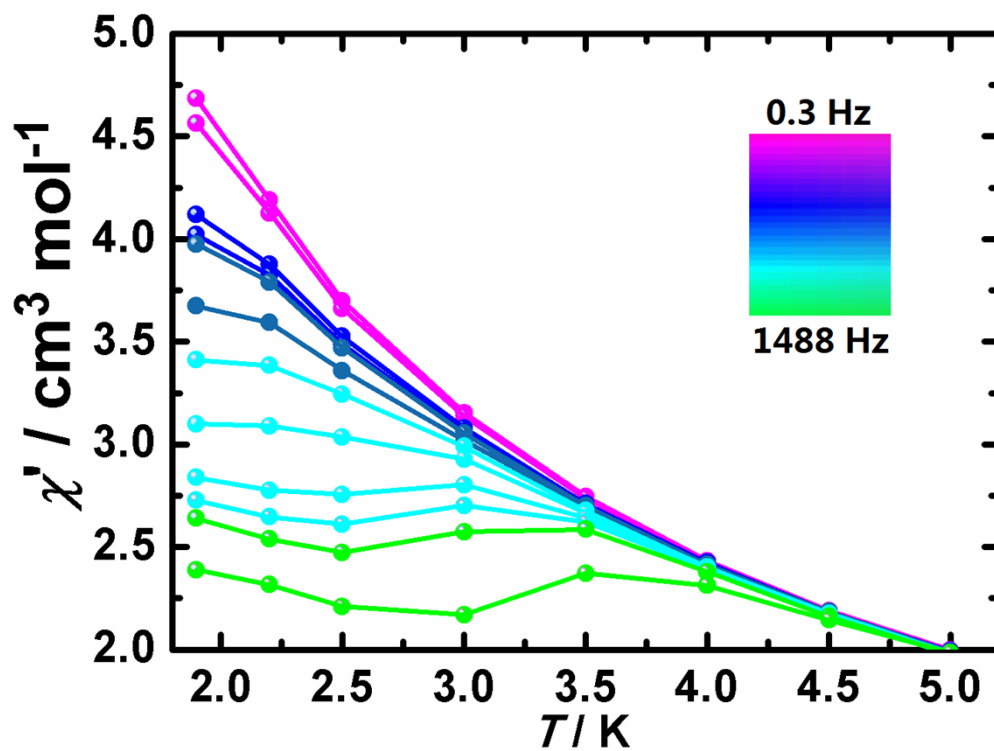

Figure S13. Temperature dependence of the  $\chi'$  product  $ac$  susceptibility under the optimal 0.7 kOe static field for I.

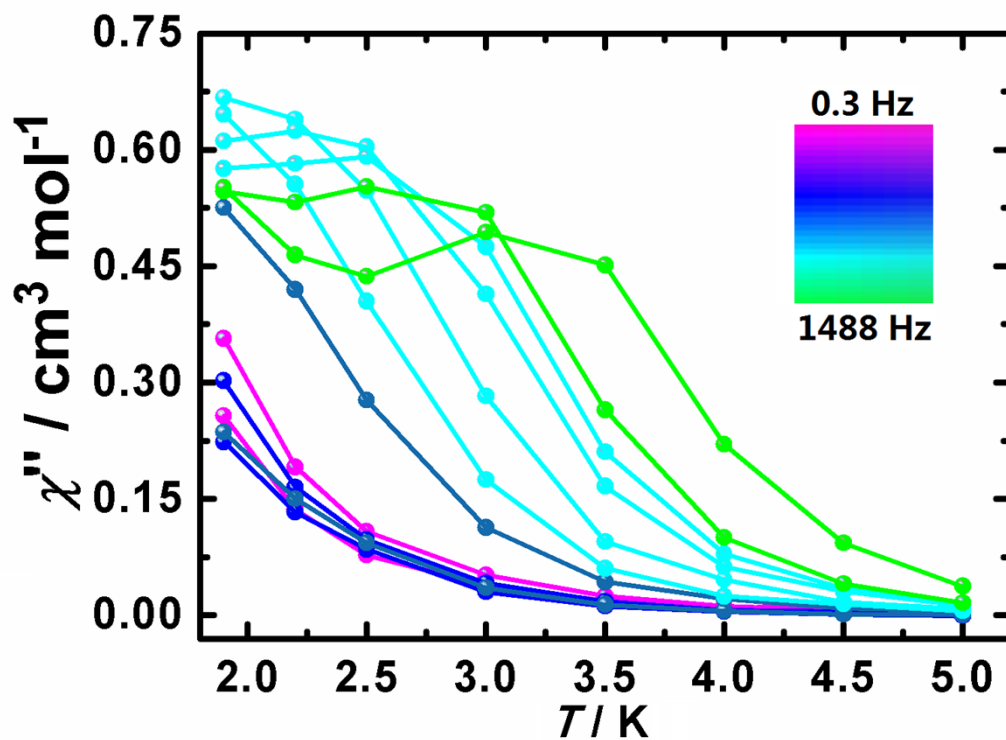

Figure S14. Temperature dependence of the  $\chi''$  product *ac* susceptibility under the optimal 0.7 kOe static field for I.

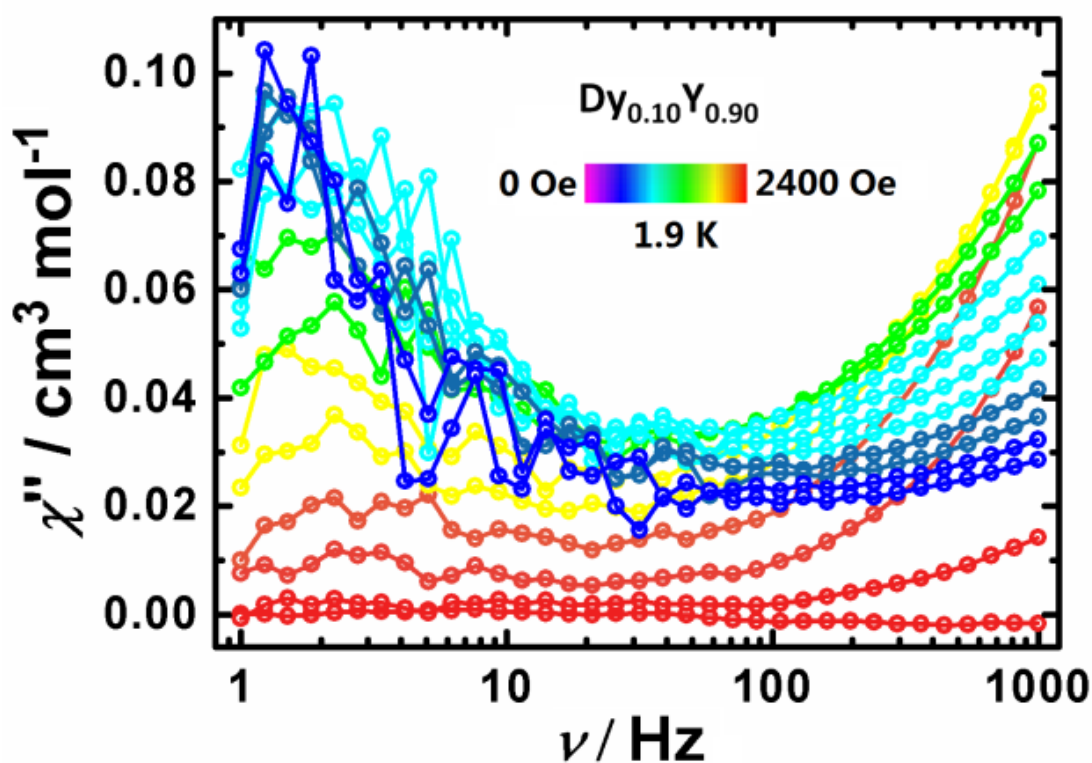

Figure S15. Variable-frequency out-of-phase *ac* susceptibility of  $\text{Dy}_{0.10}\text{Y}_{0.90}$  under various applied dc fields at 1.9 K.

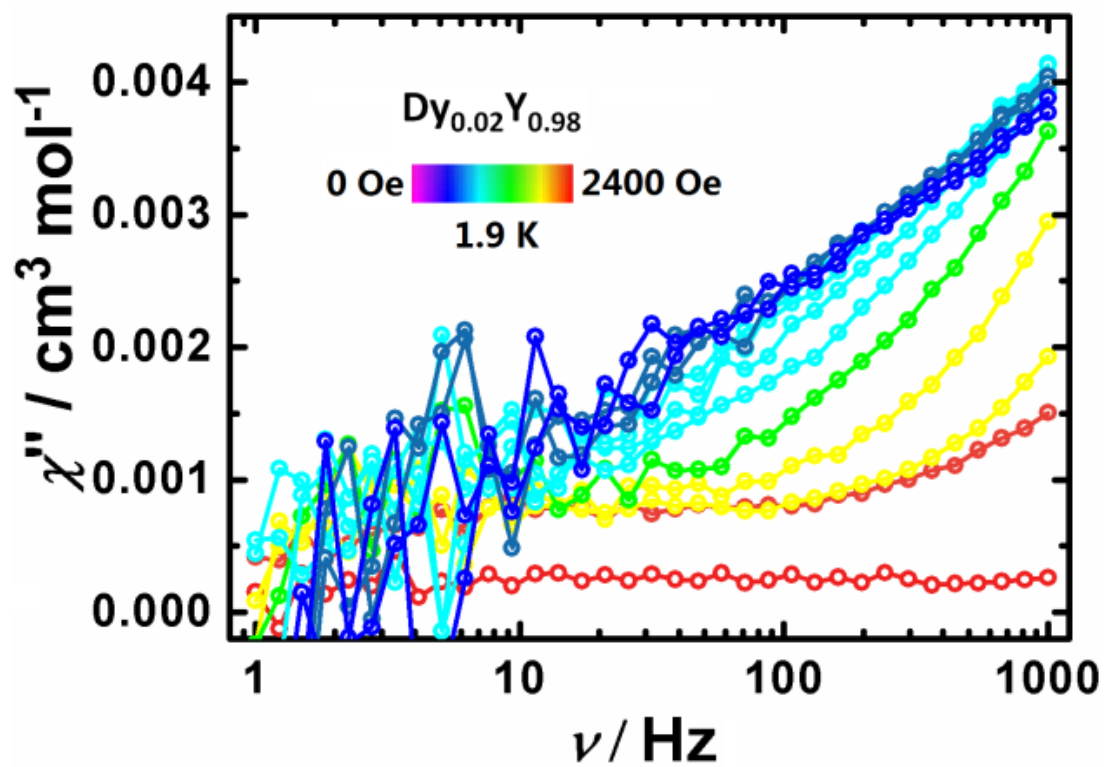

Figure S16. Variable-frequency out-of-phase ac susceptibility of  $\text{Dy}_{0.02}\text{Y}_{0.98}$  under various applied dc fields at 1.9 K.



## *Ab initio* calculations for Dy1 compound

All calculations were carried out with OpenMolcas<sup>S1</sup> and are of CASSCF/RASSI/SINGLE\_ANISO type.<sup>S2-S4</sup> Structure of Dy1 is shown in Figure1. Active space of the CASSCF method included 9 electrons in 7 orbitals for Dy (4f orbitals of Dy<sup>3+</sup> ion). On the basis of the resulting spin-orbital multiplets SINGLE\_ANISO program<sup>S5</sup> computed local magnetic properties (g-tensors, magnetic axes, local magnetic susceptibility etc.)

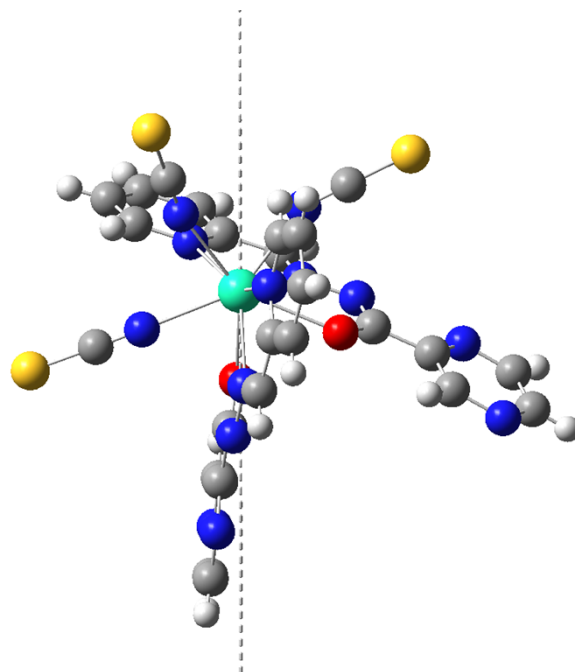

**Figure S17.** Structures of the Dy1 and main magnetic axis of ground doublet (dashed line).

**Table S6.** Contractions of the employed basis set in computational approximations for Dy1.

| Basis set |              |
|-----------|--------------|
| Dy        | ANO-RCC-VTZP |
| N         | ANO-RCC-VDZP |
| O         | ANO-RCC-VDZ  |
| C         | ANO-RCC-VDZ  |
| H         | ANO-RCC-VDZ  |
| S         | ANO-RCC-VDZ  |

**Table S7.** Energies of the lowest Kramers doublets of Dy center in Dy1.

| Spin-orbit energies (cm <sup>-1</sup> ) |         |
|-----------------------------------------|---------|
|                                         | 0.000   |
|                                         | 31.291  |
|                                         | 66.508  |
|                                         | 104.337 |
|                                         | 169.678 |
|                                         | 230.905 |
|                                         | 257.103 |
|                                         | 321.977 |

**Table S8.** The g tensors of the lowest Kramers doublets (KD) of Dy center in Dy1.

| KD |       | Dy in I      |
|----|-------|--------------|
| 1  | $g_x$ | 0.648881335  |
|    | $g_y$ | 2.113499404  |
|    | $g_z$ | 17.656407339 |
| 2  | $g_x$ | 1.097740772  |
|    | $g_y$ | 3.135091004  |
|    | $g_z$ | 13.610809426 |
| 3  | $g_x$ | 2.694784315  |
|    | $g_y$ | 5.356813725  |
|    | $g_z$ | 10.348702742 |
| 4  | $g_x$ | 1.498748998  |
|    | $g_y$ | 3.457086291  |
|    | $g_z$ | 10.972704263 |

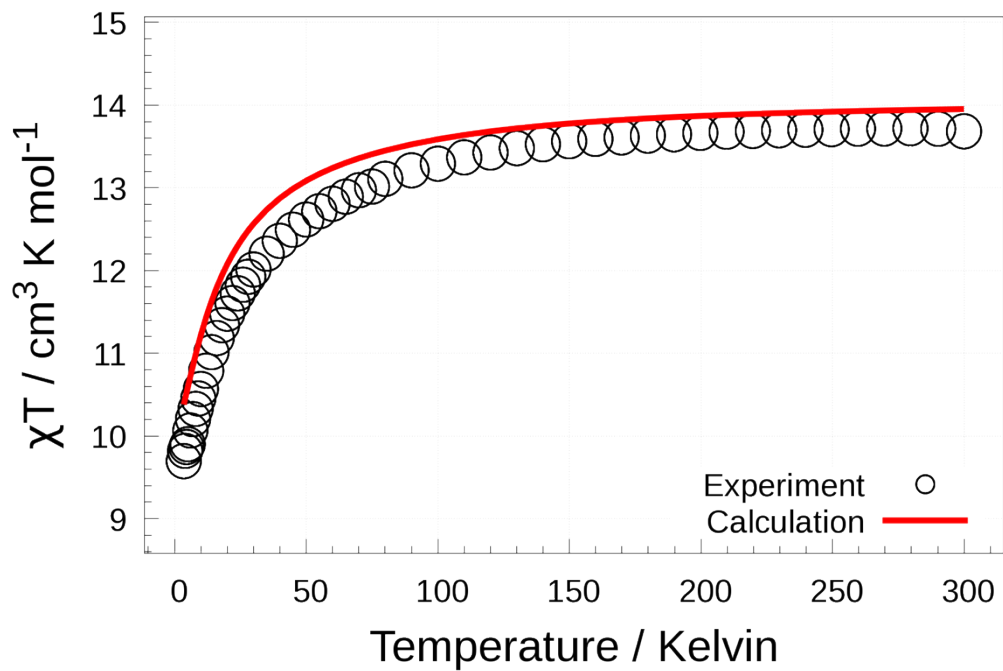

**Figure S18.** Experimental (circles) vs. calculated (red solid line) magnetic susceptibility of DyI.

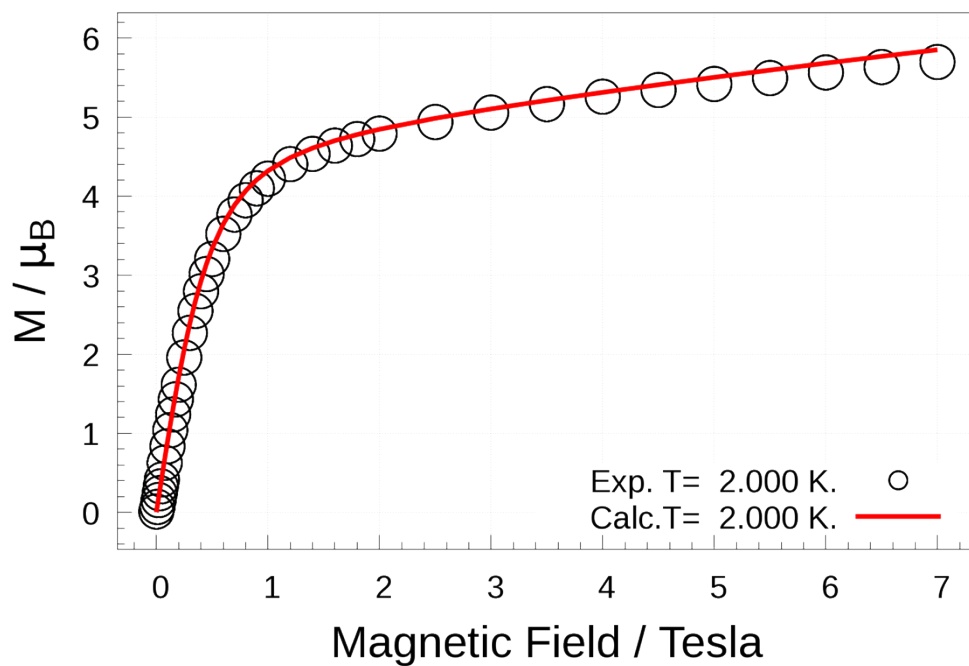

**Figure S19.** Experimental (circles) vs. calculated (red solid line) field-dependent magnetization of DyI at 2.0 K.

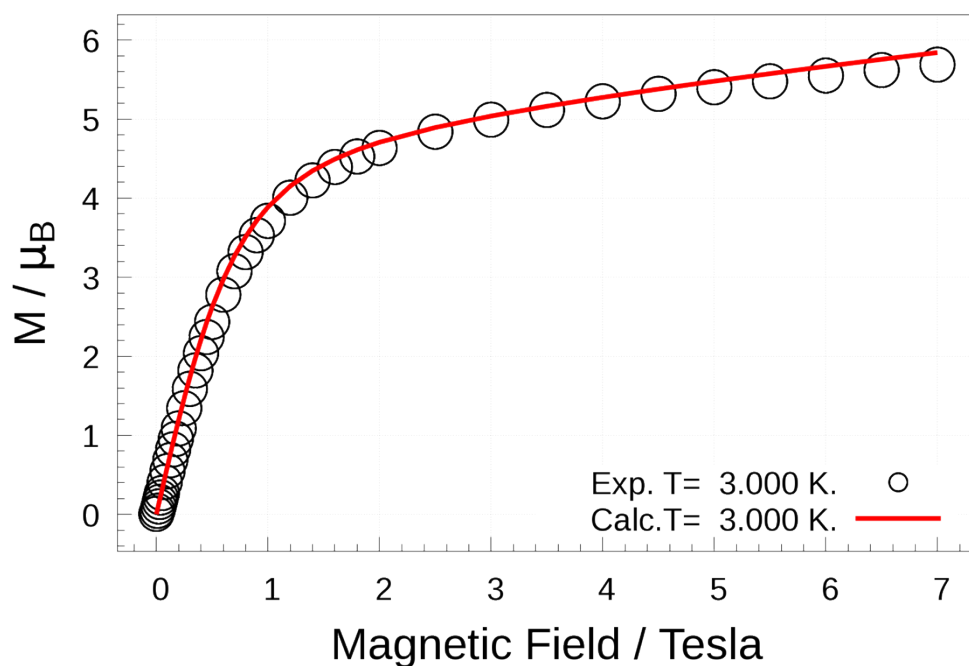

**Figure S20.** Experimental (circles) vs. calculated (red solid line) field-dependent magnetization of Dy1 at 3.0 K.

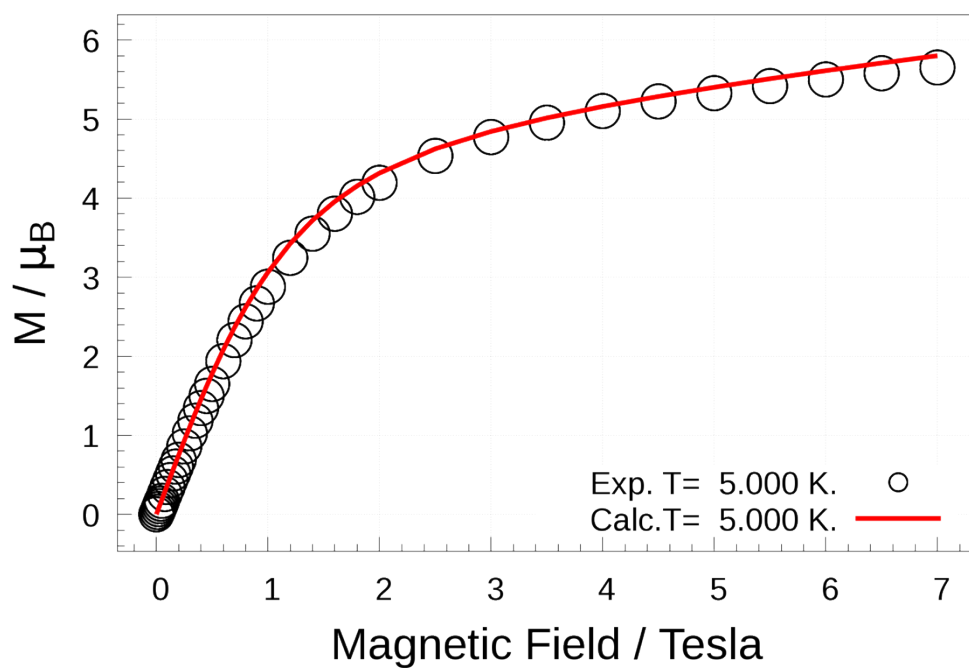

**Figure S21.** Experimental (circles) vs. calculated (red solid line) field-dependent magnetization of Dy1 at 5.0 K.

## References:

- S1 I. F. Galván, M. Vacher, A. Alavi, C. Angeli, F. Aquilante, J. Autschbach, J. J. Bao, S. I. Bokarev, N. A. Bogdanov, R. K. Carlson, L. F. Chibotaru, J. Creutzberg, N. Dattani, M. G. Delcey, S. S. Dong, A. Dreuw, L. Freitag, L. M. Frutos, L. Gagliardi, F. Gendron, A. Giussani, L. Gonzalez, G. Grell, M. Guo, C. E. Hoyer, M. Johansson, S. Keller, S. Knecht, G. Kovačević, E. Källman, G. Li Manni, M. Lundberg, Y. Ma, S. Mai, J. P. Malhado, P. Å. Malmqvist, P. Marquetand, S. A. Mewes, J. Norell, M. Olivucci, M. Oppel, Q. M. Phung, K. Pierloot, F. Plasser, M. Reiher, A. M. Sand, I. Schapiro, P. Sharma, C. J. Stein, L. K. Sørensen, D. G. Truhlar, M. Ugandi, L. Ungur, A. Valentini, S. Vancoillie, V. Veryazov, O. Weser, T. A. Wesółowski, P.-O. Widmark, S. Wouters, A. Zech, J. P. Zobel and R. Lindh, *J. Chem. Theory Comput.*, 2019, **15**, 5925–5964.
- S2 P. E. M. Siegbahn, J. Almlöf, A. Heiberg and B. O. Roos, *J. Chem. Phys.*, 1981, **74**, 2384 – 2396.
- S3 J. Olsen, B. O. Roos, P. Jørgensen and H. J. A. Jensen, *J. Chem. Phys.*, 1988, **89**, 2185 – 2192.
- S4 P. Å. Malmqvist, B. O. Roos and B. Schimmelpfennig, *Chem. Phys. Lett.*, 2002, **357**, 230– 240.
- S5 L. Ungur and L. F. Chibotaru, “SINGLE\_ANISO program,” can be found under <http://www.molcas.org/documentation/manual/>
